# Supplementary material
Source: MDPI journal article supplement (https://www.mdpi.com/2071-1050/12/24/10529)
Supplement: s1 [file s1]

**Table 1.** T-patterns: Heavier twins in task 1. All codes are explained in Supplementary Material.

| Age       | T-patterns                                                       | Occurrence |
|-----------|------------------------------------------------------------------|------------|
| 18 months | ( ch,p,g,sr ch,p,g,ur )                                          | 7          |
|           | ( ch,p,cc2,sr,nsnc ( ch,p,cc2,sr,asac a,prb ))                   | 3          |
|           | ( ch,p,lvd,sr,nsnc ( ch,p,cc2,sr,asac a,rf ))                    | 3          |
|           | ( ch,p,lvd,ur,nsnc ( ch,p,lvd,sr,asac a,rf ))                    | 3          |
| 21 months | (ch,p,cc2,sr,nsnc ch,p,lld,sr,nsnc )                             | 4          |
|           | (( ( ch,p,cc2,ur,nsnc ( ch,p,cc2,sr,asac a,rf )) ch,st ) ch,ig ) | 3          |
|           | (( ( ch,p,cc2,sr,asac a,rf )( ch,p,cl,sr ch,p,lvd,ur,nsnc ))     | 3          |
|           | (( ( ch,p,cl,sr ch,p,lvd,ur,nsnc )( ch,p,lvd,sr,asac a,rf ))     | 3          |
|           | ( ch,p,lvd,sr,asac ch,p,cc2,sr,asac )                            | 3          |
| 24 months | ( ch,p,cc2,sr,asac ( a,rf ch,if,sr,asac ))                       | 4          |
|           | (( ( ch,p,lld,sr,asac a,rf ) ch,p,cl,ur )                        | 3          |
|           | (( ( ch,p,lvd,sr,asac ch,p,lld,sr,asac ) a,rf )                  | 3          |

**Table 2.** T-patterns: Heavier twins in task 2. All codes are explained in Supplementary Material.

| Age       | T-patterns                                        | Occurrence |
|-----------|---------------------------------------------------|------------|
| 18 months |                                                   |            |
| 21 months | ( ch,p,cc2,sr,ns ch,p,cl,sr )                     | 4          |
|           | ( ch,p,cl,ur ch,p,cl,sr )                         | 4          |
| 24 months | ( ch,i ( ch,p,lvd,sr,as ( ch,p,lld,sr,as a,rf ))) | 3          |
|           | ( ch,p,lvd,sr,ns ch,p,lvd,ur,ns )                 | 3          |

**Table 3.** T-patterns: Heavier twins in task 3. All codes are explained in Supplementary Material.

| Age       | T-patterns                                                                | Occurrence |
|-----------|---------------------------------------------------------------------------|------------|
| 18 months | ( ch,p,cc2,sr,acns,csd ch,p,cc2,sr,acns )                                 | 3          |
| 21 months | (( ch,i ( ch,p,cc2,sr,asnc ( ch,p,lvd,sr,asnc a,rf ))) ch,p,cc2,ur,acns ) | 3          |
|           | ( ch,p,lvd,sr,asnc ( ch,p,lld,sr,asnc a,rf ))                             | 4          |
| 24 months | ( ch,p,lvd,ur,acns ch,p,lvd,sr,nsnc )                                     | 3          |
|           | ( ch,p,cl,ur ch,p,cc2,sr,nsnc )                                           | 3          |

**Table 4.** T-patterns: Lighter twins in task 1. All codes are explained in Supplementary Material.

| Age       | T-patterns                                                                                    | Occurrence |
|-----------|-----------------------------------------------------------------------------------------------|------------|
| 18 months | ( ch,p,g,sr ch,p,cc1,sr )                                                                     | 4          |
|           | ( ch,p,cc1,ur ch,p,cc1,sr )                                                                   | 4          |
|           | (( ch,p,1vd,sr,asac a,rf ) ch,p,1vd,sr,nsnc )                                                 | 3          |
|           | ( ch,p,cc2,ur,asac ch,p,1vd,sr,nsnc )                                                         | 3          |
| 21 months | ( ch,p,cl,sr ch,p,cl,ur )                                                                     | 5          |
|           | (( ch,p,cc2,sr,asac a,rf ) ch,p,1vd,sr,nsnc )                                                 | 4          |
|           | (( ch,p,1vd,sr,asac a,rf ) ch,p,cc2,sr,asac )                                                 | 4          |
|           | ( ch,p,1vd,sr,asac ( ch,p,11d,sr,asac a,rf ) )                                                | 4          |
|           | ( ch,p,cc2,ur,nsnc ch,p,cc2,sr,nsnc )                                                         | 4          |
|           | ( ch,p,cc2,ur,nsnc (( ch,st ch,r,cc2,sr,asac,csd ) a,prb ) )                                  | 3          |
|           | ( ch,p,1vd,sr,nsnc (( ch,st ch,r,cc2,sr,asac,csd ) a,prb ) )                                  | 3          |
|           | (( ch,p,g,ur ch,p,g,sr ) ch,p,cc2,ur,nsnc )                                                   | 3          |
|           | (( ch,p,cc2,ur,asac a,rf ) ch,p,11d,ur,nsnc )                                                 | 3          |
|           | ( ch,p,cc1,ur ch,p,cc1,sr )                                                                   | 3          |
|           | ( ch,p,1vd,sr,nsnc ch,p,1vd,ur,nsnc )                                                         | 3          |
|           | ( ch,p,11d,sr,nsnc ch,p,1vd,sr,nsnc )                                                         | 3          |
|           | ( ch,p,1vd,sr,nsnc ch,p,1vd,sr,asac )                                                         | 3          |
|           | ( ch,p,1vd,sr,asac ch,p,11d,sr,nsnc )                                                         | 3          |
|           | ( ch,p,cc2,sr,asac ( a,prb (( ch,ig ch,p,cc2,sr,asac,csd )( a,rf ch,if,sr,asac ))) )          | 3          |
|           | (( ch,i ch,p,1vd,sr,asac )( ch,p,cc2,sr,nsnc ( ch,p,1vd,sr,nsnc ( ch,p,cc2,sr,asac a,rf ) ))) | 3          |
|           | (( ch,i ch,p,cl,sr )( ch,p,g,ur ch,p,g,sr )( ch,p,11d,sr,asac a,rf ) )                        | 3          |
| 24 months | ( ch,p,cl,sr ( ch,p,1vd,sr,nsnc ( ch,p,cc2,sr,asac ( a,rf ch,p,cc2,sr,nsnc ) )))              | 3          |
|           | ( ch,i (( ch,p,cl,ur ch,p,cl,sr )( ch,p,g,ur ch,p,g,sr ) )                                    | 3          |
|           | (( ( ch,i ch,p,cl,sr ) ch,p,cl,ur )( ch,p,1vd,sr,nsnc a,rf ) )                                | 3          |
|           | (( ch,p,cc2,sr,asac a,rf )( ch,p,cc2,sr,nsnc ( ch,p,g,sr ch,p,g,ur ) )                        | 3          |
|           | (( ( ch,i a,rf )( ch,p,g,sr ch,p,1vd,sr,asac ) ) ch,p,cl,ur )                                 | 3          |
|           | ( ch,i (( ch,p,g,sr ch,p,1vd,sr,asac )( a,rf ch,p,1vd,sr,nsnc ) )                             | 3          |
|           | (( ch,i ch,p,cl,sr )( ch,p,1vd,sr,nsnc ( ch,p,1vd,sr,asac a,rf ) )                            | 3          |
|           | (( ( ch,i ch,p,cc2,sr,asac )( ch,p,1vd,sr,asac a,rf ) ) ch,p,cl,ur )                          | 3          |
|           | ( ch,p,cl,sr ( ch,p,1vd,sr,nsnc ( ch,p,g,ur ch,p,g,sr ) )                                     | 3          |
|           | ( ch,p,cc2,sr,asac (( a,rf ch,p,g,sr ) ch,p,1vd,sr,nsnc ) )                                   | 3          |
|           | (( ch,p,cc2,sr,asac a,rf )( ch,p,1vd,ur,nsnc ch,p,1vd,sr,nsnc ) )                             | 3          |
|           | (( ch,i ch,p,11d,sr,asac )( a,rf ch,p,1vd,sr,asac ) )                                         | 3          |
|           | ( ch,p,cl,sr ( ch,p,11d,sr,nsnc ch,st ) )                                                     | 3          |
|           | ( ch,p,g,sr ( ch,p,1vd,sr,asac ch,p,g,ur ) )                                                  | 3          |

**Table 5.** T-patterns: Lighter twins in task 2. All codes are explained in Supplementary Material.

| Age       | T-patterns                                                                                           | Occurrence |
|-----------|------------------------------------------------------------------------------------------------------|------------|
| 18 months | ( ch,p,g,ur ch,p,g,sr )                                                                              | 4          |
|           | ( ch,p,cl,ur ch,p,cl,sr )                                                                            | 3          |
| 21 months | ( ch,p,cl,sr ch,p,g,sr )                                                                             | 4          |
|           | ( ch,p,g,ur ( ch,p,cc2,sr,as a,rf ) )                                                                | 3          |
|           | ( ch,p,g,sr ch,p,cc2,sr,ns )                                                                         | 3          |
|           | ( ch,p,lvd,ur,as ch,p,lvd,sr,ns )                                                                    | 3          |
|           | (( ch,i ( ch,p,cc2,ur,ns ch,p,lvd,ur,ns ))( ch,p,cc2,sr,as ( a,rf ( ch,p,lvd,sr,as ch,if,sr,as ) ))) | 3          |
| 24 months | (( ch,i ch,p,l1d,sr,ns )( ch,p,cl,sr ( a,prb ( ch,p,cc2,sr,as,csd a,rf ) )))                         | 3          |
|           | (( ch,i ch,p,l1d,sr,ns )( ch,p,cc2,sr,ns ch,st ) ( a,prb a,rf ) )                                    | 3          |
|           | ( ch,i ( ch,p,lvd,sr,as ( ch,p,l1d,sr,as a,rf ) ) )                                                  | 3          |
|           | ( ch,p,l1d,sr,ns (( ch,p,lvd,sr,ns ch,p,cl,sr ) ( a,rf ch,if,sr,as ) ) )                             | 3          |
|           | ( ch,i ( ch,p,cc2,ur,ns ch,p,cc2,sr,ns ) )                                                           | 3          |
|           | (( ch,i ch,p,cc2,ur,ns )( ch,p,l1d,sr,as a,rf ) )                                                    | 3          |
|           | (( ch,i ch,p,l1d,sr,ns )( ch,p,l1d,sr,as a,rf ) )                                                    | 3          |
|           | (( ch,p,cl,sr ch,p,g,sr )( ch,p,cc2,sr,as a,rf ) )                                                   | 3          |
|           | (( ch,i ch,p,cc2,sr,ns )( ch,p,cl,ur ch,p,g,sr ) )                                                   | 3          |
|           | ( ch,p,cc2,sr,ns (( ch,p,lvd,sr,ns ch,p,cl,sr ) ( ch,p,lvd,sr,as a,rf ) ) )                          | 3          |
|           | ( ch,p,lvd,sr,ns (( ch,p,cl,sr ch,p,g,sr ) ( ch,p,lvd,sr,as a,rf ) ) )                               | 3          |
|           | ( ch,p,lvd,sr,ns ( ch,p,g,sr ( ch,p,cc2,sr,as ( a,rf ch,p,lvd,sr,as ) ) ) )                          | 3          |
|           | ( ch,p,g,ur ch,p,g,sr )                                                                              | 3          |
|           | ( ch,p,cc2,sr,ns (( ch,p,lvd,sr,ns ch,p,g,sr ) ( ch,p,lvd,sr,as a,rf ) ) )                           | 3          |

**Table 6.** T-patterns: Lighter twins in task 3. All codes are explained in Supplementary Material.

| Age       | T-patterns                                                                           | Occurrence |
|-----------|--------------------------------------------------------------------------------------|------------|
| 18 months | (( ch,i ch,p,cc2,sr,nsnc )( ch,p,cl,sr ch,p,g,ur ))                                  | 3          |
|           | ( ch,p,cl,sr ch,p,cc1,sr )                                                           | 3          |
|           | ( ch,p,lvd,sr,acns ch,p,cc2,ur,acns )                                                | 3          |
| 21 months | ( ch,p,l1d,sr,acns ch,p,g,sr )                                                       | 4          |
|           | ( ch,p,lvd,sr,acns ch,p,l1d,sr,acns )                                                | 3          |
| 24 months | (( ch,p,cc2,sr,acns ch,p,lvd,sr,asnc ) ch,p,g,ur )                                   | 4          |
|           | ( ch,p,lvd,sr,nsnc (( ch,p,lvd,sr,asnc a,rf )( ch,p,cc2,sr,acns ch,p,cc2,sr,asnc ))) | 3          |
|           | (( ch,p,lvd,sr,asnc ( a,rf ch,p,cc2,sr,nsnc )) ch,p,g,ur )                           | 3          |
|           | (( ch,p,l1d,sr,acns a,rf )( ch,p,lvd,sr,acns ch,if,sr,acns ))                        | 3          |
|           | (( ch,p,cc2,sr,nsnc ch,p,lvd,sr,asnc )( ch,p,cc2,sr,asnc a,rf ))                     | 3          |
|           | (( ch,p,lvd,sr,acns ch,p,cc2,sr,acns )( ch,p,lvd,sr,asnc ch,p,cc2,sr,asnc ))         | 3          |
|           | (( ch,p,cc2,sr,nsnc a,rf )( ch,p,cc2,sr,acns ch,p,cc2,sr,asnc ))                     | 3          |
|           | (( ch,p,cc2,sr,nsnc ch,p,cc2,sr,asnc )( a,rf ch,p,lvd,sr,acns ))                     | 3          |
|           | ( ch,p,cc2,ur,acns ( ch,p,g,ur ch,p,cl,ur ))                                         | 3          |
|           | ( ch,p,cc2,sr,nsnc ( ch,p,g,sr ch,p,cc2,sr,asnc ))                                   | 3          |
|           | (( ch,p,cc2,sr,acns ch,p,cc2,sr,asnc ) ch,p,g,ur )                                   | 3          |
|           | (( ch,p,g,sr ch,p,g,ur ) ch,p,lvd,sr,asnc )                                          | 3          |
|           | ( ch,p,g,sr ( ch,p,cc2,sr,asnc ch,p,lvd,sr,asnc ))                                   | 3          |
|           | ( ch,p,cc2,ur,acns ( ch,p,cc2,sr,acns ch,p,cc2,sr,asnc ))                            | 3          |
|           | ( ch,p,lvd,sr,acns ( ch,p,lvd,sr,nsnc ch,p,cc2,sr,asnc ))                            | 3          |
|           | ( ch,p,cc2,sr,asnc ( a,prb ch,p,l1d,sr,acns ))                                       | 3          |
|           | ( ch,p,cc2,sr,acns ( ch,p,g,ur ch,p,g,sr ))                                          | 3          |
|           | ( ch,p,cl,ur ch,p,cl,sr )                                                            | 3          |
|           | ( ch,p,cl,sr ch,p,lvd,sr,asnc )                                                      | 3          |
